# Supplementary material for: Phosphine-based porous aromatic frameworks for gold nanoparticle immobilization with superior catalytic activities
Source: Royal Society of Chemistry journal article supplement (doi:10.1039/c8ta12099d), 2019-01-01
Supplement: c8ta12099d1.pdf [file c8ta12099d1.pdf]

Supplementary Information

**Phosphine-based porous aromatic frameworks for gold  
nanoparticle immobilization with superior catalytic efficiency**

Yuting Yang, Tienan Wang, Xiaofei Jing\* and Guangshan Zhu\*

Key Laboratory of Polyoxometalate Science of Ministry of Education, Northeast  
Normal University, Changchun 130024, P. R. China.

\*E-mail: [zhugs@nenu.edu.cn](mailto:zhugs@nenu.edu.cn)

## **Instrumental characterization**

Fourier transform infrared spectroscopy (FTIR) spectra (film) were measured using a Nicolet Magna 560IR spectrometer. Solid-state  $^{13}\text{C}$  and  $^{31}\text{P}$  cross polarization magic angle spinning nuclear magnetic resonance (CP/MAS NMR) measurements were performed on a Bruker Avance III model 400 MHz NMR spectrometer at a MAS rate of 5 kHz. X-ray photoelectron spectroscopy (XPS) was performed using a Thermo ESCALAB 250. Scanning electron microscopy (SEM) imaging was performed on a JEOL JSM 6700. Transmission electron microscopy (TEM) was recorded using a JEOL JEM 3010 with an acceleration voltage of 300 kV. Thermogravimetric analysis (TGA) was performed using a Perkin-Elmer TGA analyzer system at a heating rate of  $10\text{ }^{\circ}\text{C min}^{-1}$  in air. Powder X-ray diffraction (PXRD) was performed with a Siemens D5005 diffractometer with scanning rate of  $4\text{ }^{\circ}\text{C min}^{-1}$  ( $2\theta$ ). The gas adsorption–desorption isotherms were measured on a Quantachrome Autosorb-iQ2 analyzer. The conversion progress of 4-NP reduction was monitored by Cary 50 Conc UV-visible spectrophotometer.

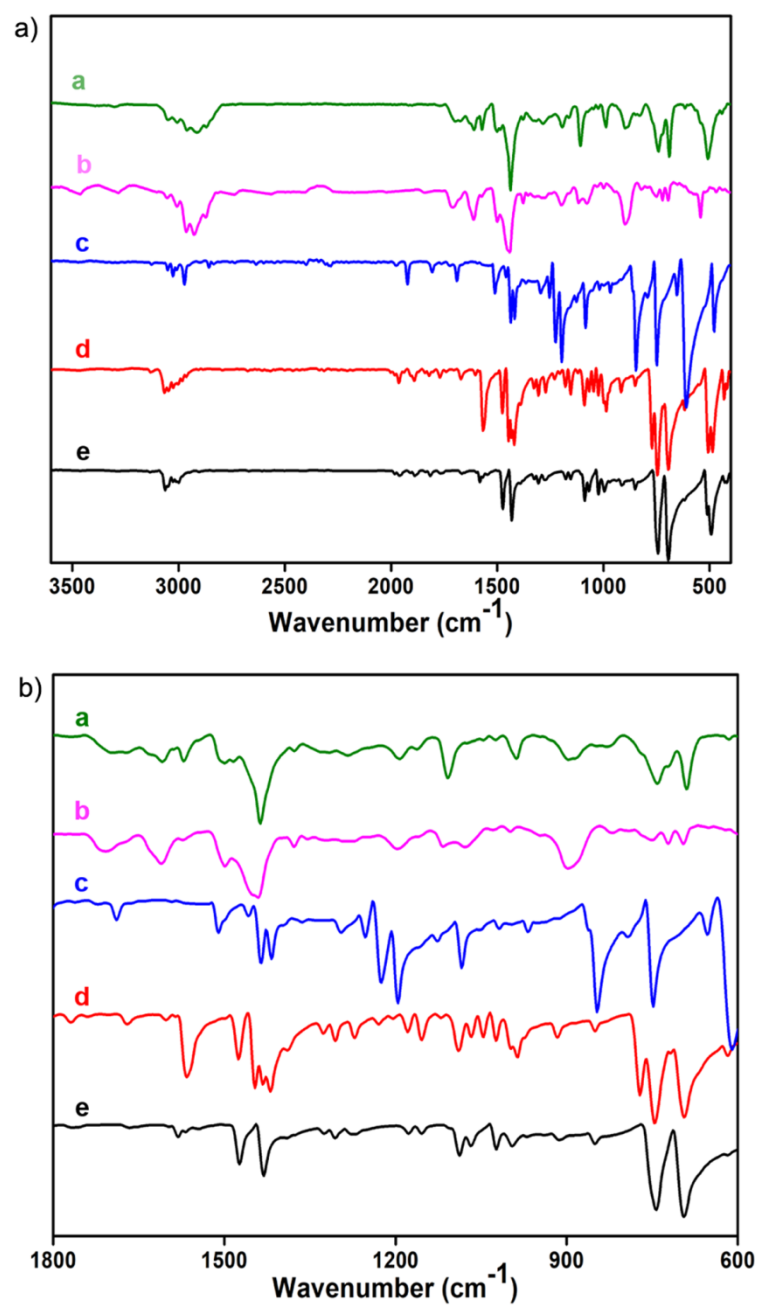

**Fig. S1** FTIR spectra in the range of a) 4000-400  $\text{cm}^{-1}$  and b) 1800-600  $\text{cm}^{-1}$  of  $\text{PPh}_3$  (a),  $\text{PPh}_2\text{Py}$  (b), DBpX (c), PAF-93 (e), and PAF-94 (f), respectively.

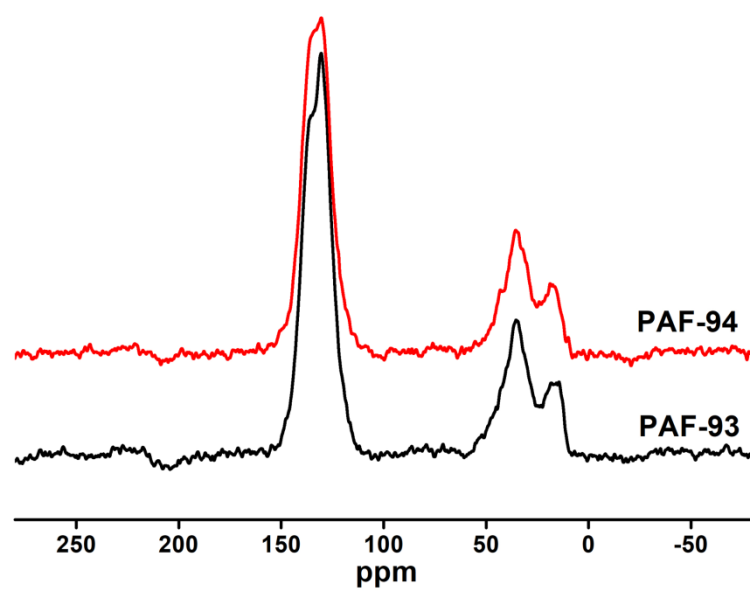

**Fig. S2**  $^{13}\text{C}$  solid-state NMR spectra of PAF-93 and PAF-94.

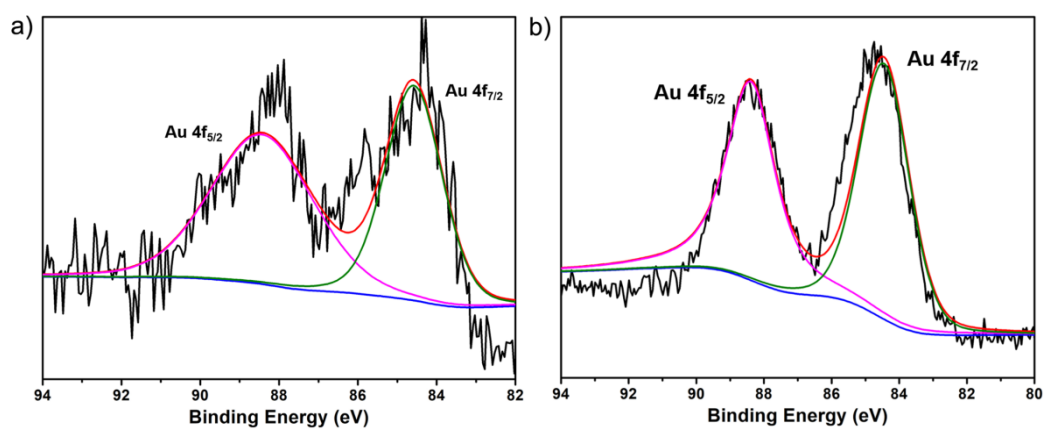

**Fig. S3** Au 4f region in the XPS spectra of Au@PAF-93 (a) and Au@PAF-94 (b).

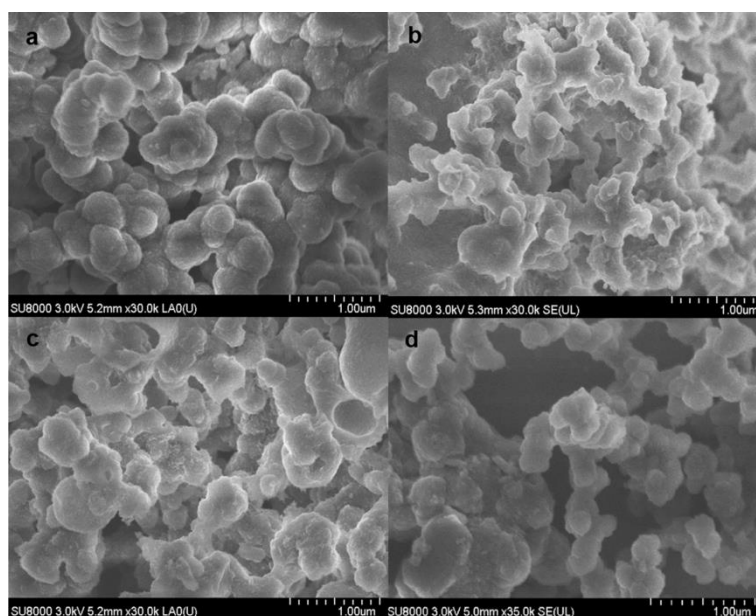

**Fig. S4.** SEM images of PAF-93 (a), Au@PAF-93 (b), PAF-94 (c) and Au@PAF-94 (d), respectively.

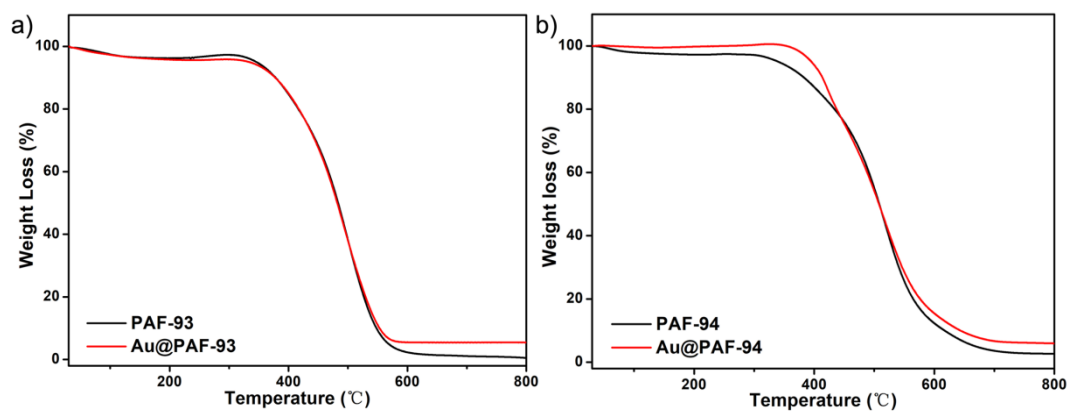

**Fig. S5** TGA curves of PAF-93 (a), PAF-94 (b) and their corresponding Au@PAFs.

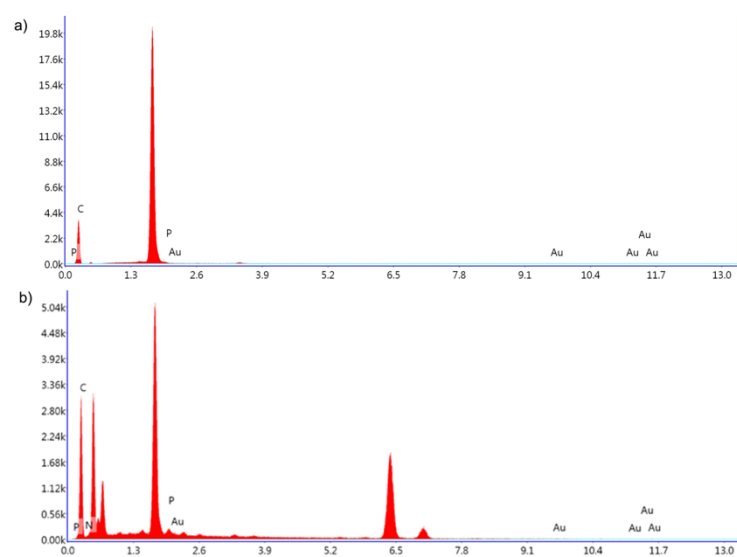

**Fig. S6** EDX spectra of Au@PAF-93 (a) and Au@PAF-94 (b).

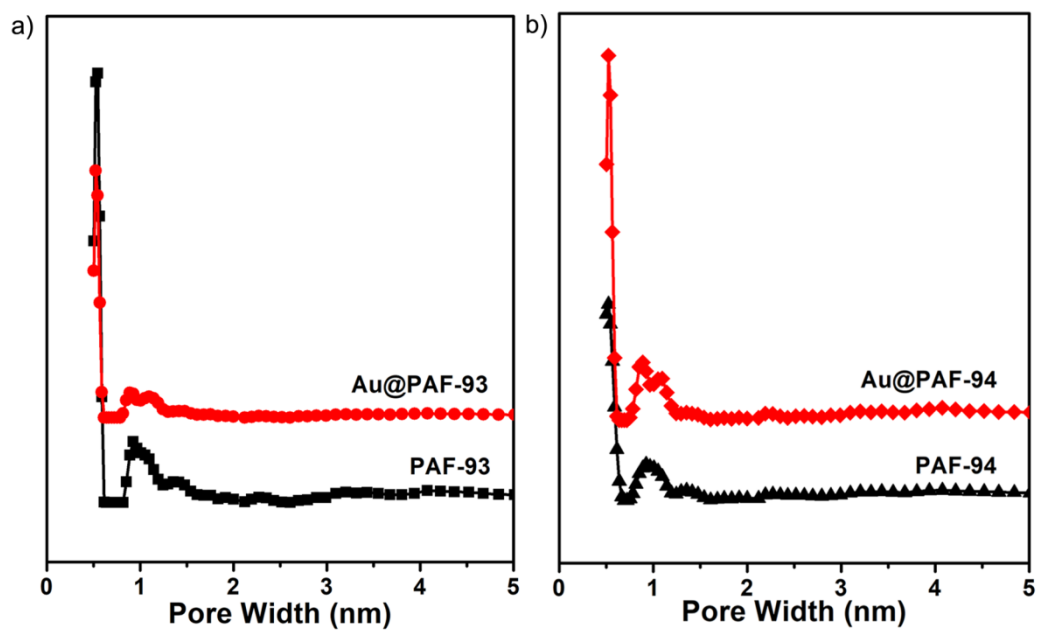

**Fig. S7** Pore size distributions of PAF-93 (a), PAF-94 (b) and their corresponding Au@PAFs.

**Table S1** Summary of rate constants of other similar 4-NP reduction reactions catalysed by previously reported AuNPs catalysts with solid supports.

| Catalysts           | Size (nm) | Au content (%) | Rate constant, $k$ (s <sup>-1</sup> ) | Reference |
|---------------------|-----------|----------------|---------------------------------------|-----------|
| Au@TpPa-1           | 5         | 1.2            | $5.35 \times 10^{-3}$                 | 26        |
| Au@CPF-1            | 5         | 1.24           | $5.05 \times 10^{-3}$                 | 35        |
| Au/COF              | 13        | 0.2            | $7.66 \times 10^{-3}$                 | 27        |
| Au@CPOP             | 4.5±1.5   | 10.5           | $4.04 \times 10^{-3}$                 | 47        |
| Au@MIL-100          | 60        | 35.55          | $5.5 \times 10^{-3}$                  | 48        |
| Au@SiO <sub>2</sub> | 104±9     | --             | $14 \times 10^{-3}$                   | 13        |
| Au/MgO              | 5-7       | 1.34           | $7.6 \times 10^{-3}$                  | 49        |
| Au@Ag/MOF           | 2-6       | 2              | $5.05 \times 10^{-3}$                 | 17        |
| Au@PAF-93           | 2.8±0.3   | 2.72           | $2.68 \times 10^{-3}$                 | This work |
| Au@PAF-94           | 1.9±0.4   | 4.25           | $22 \times 10^{-3}$                   | This work |

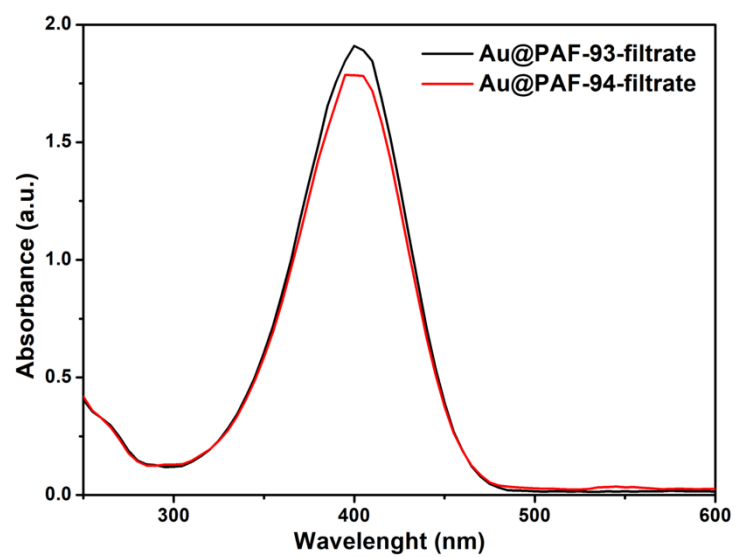

**Fig. S8** UV-vis spectra of the reduction of 4-NP after 30 min catalysed by the filtrate solution of Au@PAF-93 and Au@PAF-94 catalysts.

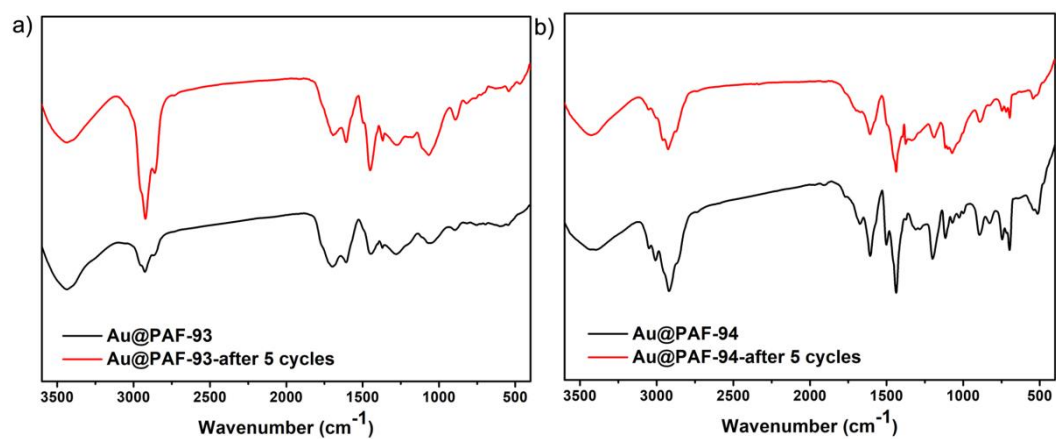

**Fig. S9** FTIR spectra of fresh Au@PAF-93 (a), Au@PAF-94 (b), and their corresponding recycled Au@PAFs catalysts, respectively.

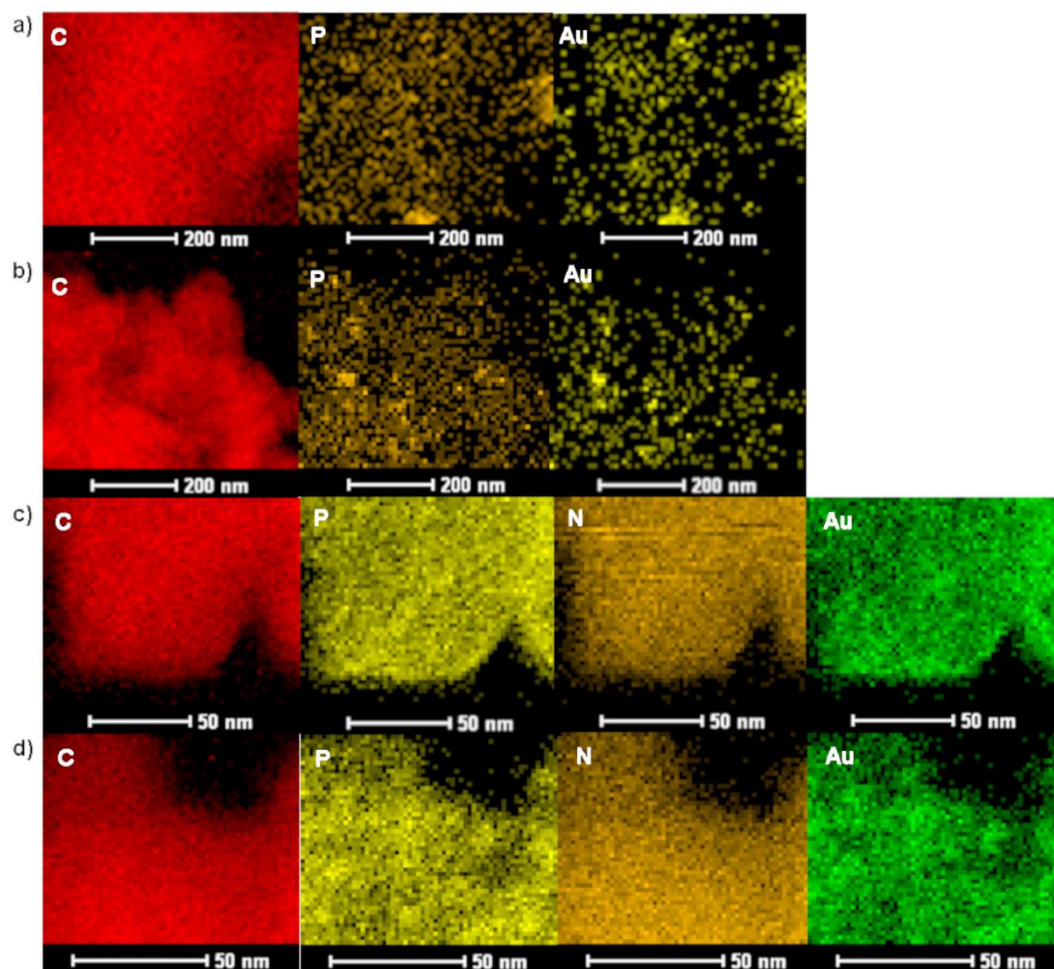

**Fig. S10** TEM-EDX mapping images of fresh Au@PAF-93 (a), Au@PAF-94 (c), and their corresponding recycled Au@PAFs catalysts (b). recycled Au@PAF-93, d). recycled Au@PAF- 94), respectively.

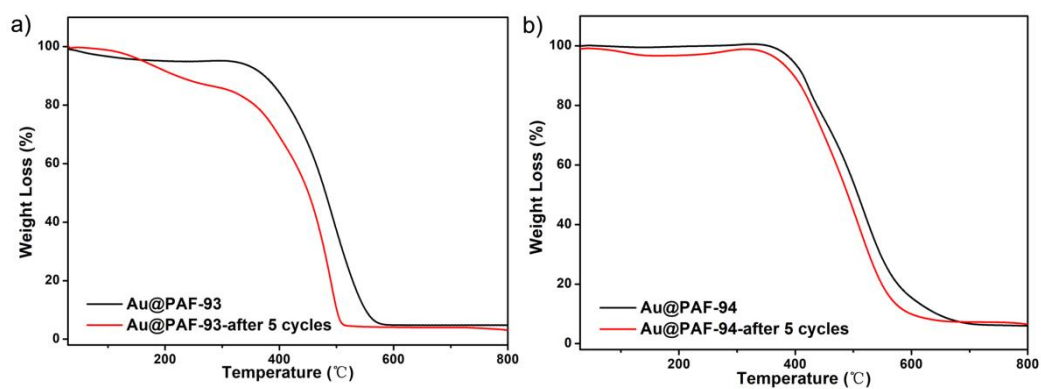

**Fig. S11** TGA curves of fresh Au@PAF-93 (a), Au@PAF-94 (b), and their corresponding recycled Au@PAFs catalysts, respectively.
